# Supplementary material
Source: PubMed Central journal article supplement (PMC3677432)
Supplement: 1220894110_pnas.201220894SI.pdf [file 1220894110_pnas.201220894SI.pdf]

# Supporting Information

Maywood et al. 10.1073/pnas.1220894110

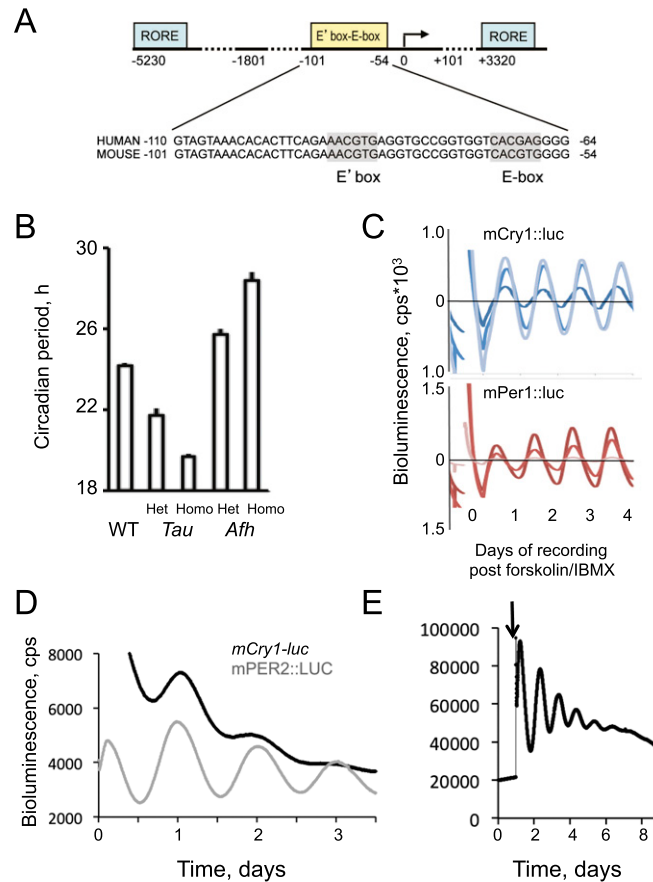

**Fig. S1.** Circadian *mCry1* reporter expressed in suprachiasmatic nucleus (SCN) and peripheral tissues. (A) Schematic of genomic *mCry1* region (−1,504 to +107) used to create circadian reporter, indicating location of included E/E' boxes and RORE elements (not included). (B) Circadian period of SCN *mCry1-luc* bioluminescence rhythms from WT ( $n = 28$ ), heterozygous ( $n = 10$ ) and homozygous ( $n = 6$ ) CK1 $\epsilon$ <sup>Tau</sup>, and heterozygous ( $n = 3$ ) and homozygous ( $n = 5$ ) Fbx13<sup>Afh</sup> mice (group data; mean  $\pm$  SEM). (C) Circadian bioluminescence rhythms of SCN from *mCry1-luc* and *mPer1-luc* mice ( $n = 3$  for each) previously treated with forskolin/isobutyl-1-methylxanthine (IBMX) and then released to free run by transfer to fresh medium. Note synchronous oscillations of slices within a genotype and phase delay of *mCry1* slices relative to *mPer1* slices. (D) Representative bioluminescence recordings from kidney explants of *mCry1-luc* and mPER2::LUC mice. Note weaker definition in the former. (E) Representative bioluminescence recording from *mCry1-luc* MEFs. Culture was given a medium change (arrow) after the original rhythm had previously damped out after 8 d of recording.

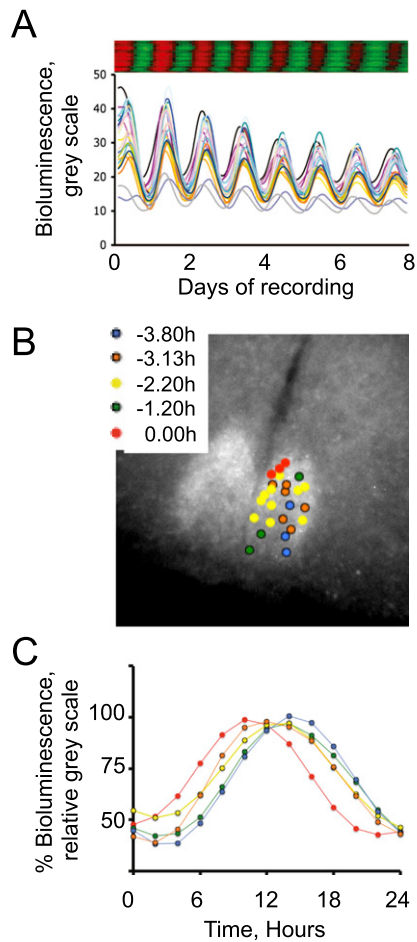

**Fig. S2.** Temporal and spatial patterns of cellular bioluminescence rhythms in *mCry1-Luc* SCN. (A) Cellular rhythms recorded by CCD from representative SCN plotted graphically and as a raster plot (*Upper*) reveal tight synchrony and phase dispersion. (B) Location within SCN of representative groups of cells color-coded by phase of bioluminescence rhythm. Legend indicates mean phase of oscillation of each group in relation to the phase-leading cells at the dorsomedial lip of the SCN (red). (C) Twenty-four-hour profile of cellular bioluminescence (normalized to peak of 100% to facilitate comparison) of representative cells from color-coded phase clusters identified in B. Note dorsomedial-to-ventrolateral phase gradient.

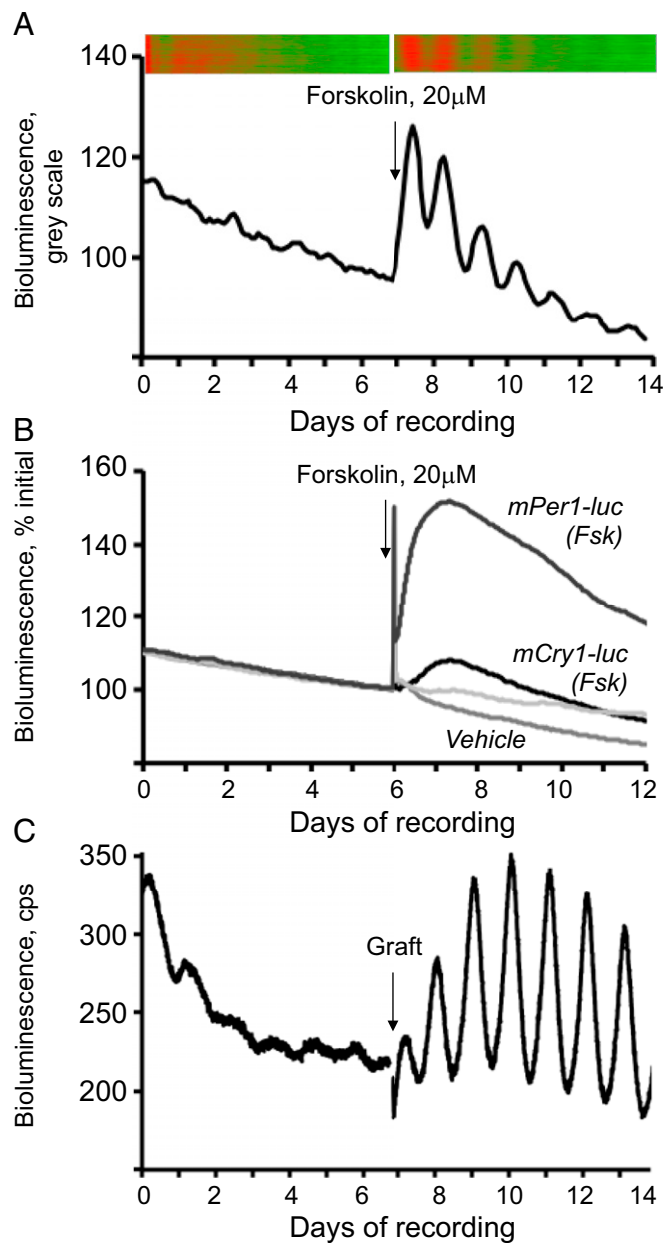

**Fig. 53.** Regulation of *mCry1* expression in SCN by extracellular cues. (A) Bioluminescence emission recorded by CCD of representative VPAC2-deficient *mCry1-luc* SCN treated with forskolin (20µM). (Upper) Raster plots of bioluminescence from cells before and after forskolin. (B) Bioluminescence emission from PER1/PER2-deficient SCN carrying *mCry1-luc* (black, medium gray) or *mPer1-luc* reporters (dark gray, light gray) and treated with vehicle ( $n = 3$  and  $n = 5$ ) or forskolin ( $n = 6$  and  $n = 5$ ). Data plotted as mean without SEM for clarity. SEMs were  $\leq 10\%$  of mean for all measures. (C) Bioluminescence emission from representative VIP-deficient *mCry1-luc* SCN that received a WT SCN graft at time indicated. Note damped rhythm before grafting and restoration of rhythm by WT SCN graft. (Before graft: amplitude,  $26.25 \pm 8.68$ ; relative amplitude error (RAE),  $0.140 \pm 0.032$ ; with graft amplitude,  $75.45 \pm 17.50$ ; RAE,  $0.044 \pm 0.004$ ; both  $P < 0.05$  by paired  $t$  test; mean  $\pm$  SEM;  $n = 5$ .)

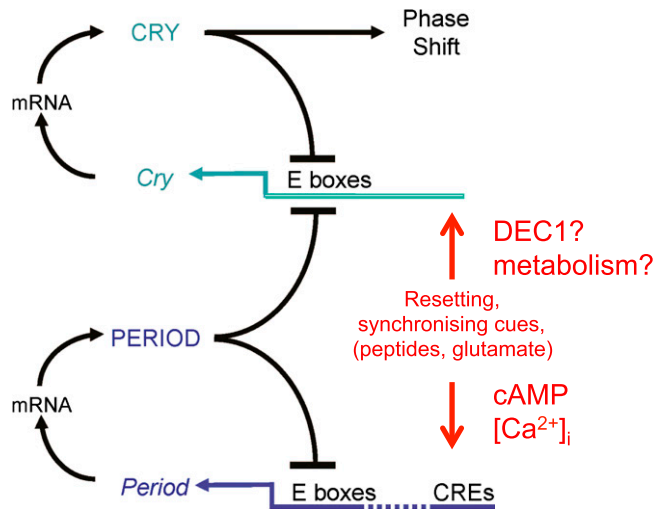

**Fig. 54.** Schematic model of interactions between extracellular signals and *Per* and *Cry1* expression. E-boxes are central to circadian expression of *Per* and *Cry*. In addition, resetting/synchronising cues act upon CREs to regulate *Per1* and *Per2* expression, which in turn negatively regulate the *Cry* E-boxes, leading to complementary resetting of CRY expression. The shift to *Per* may be further stabilized by resynchronized CRY expression acting on *Per* E-boxes. This completes the coordinated phase shift/synchronization of the SCN molecular program and thereby directs shifts in behavioral and metabolic rhythms. Resetting cues can also act via PER1/PER2-independent pathways. These await identification but may involve metabolic signals and/or altered DEC-1 expression.

**Table S1.** Bioluminescence emissions from explants from mPER2::LUC and *mCry1-luc* reporter mice

| Tissue | mPER2::Luc bioluminescence (n = 6) | <i>mCry1-luc</i> bioluminescence (n = 12) |
|--------|------------------------------------|-------------------------------------------|
| Kidney | 1,821 ± 416                        | 1,914 ± 461 n.s.                          |
| Liver  | 1,031 ± 270                        | 1,027 ± 255 n.s.                          |
| Lung   | 2,022 ± 559                        | 1,295 ± 305 n.s.                          |

Values presented as mean ± SEM. n.s., no significant difference vs. corresponding mPER2::LUC data by *t* test.

**Table S2.** Summary statistics for circadian bioluminescence rhythms recorded from mPER2::LUC and *mCry1-luc* reporter mice

| Tissue | mPER2::LUC     |               |                 | <i>mCry1-luc</i>     |                 |                    |
|--------|----------------|---------------|-----------------|----------------------|-----------------|--------------------|
|        | Period, h      | Amplitude     | RAE             | Period, h            | Amplitude       | RAE                |
| Kidney | 24.4 ± 0.4 (6) | 373 ± 115 (6) | 0.10 ± 0.01 (6) | 23.5 ± 1.1 n.s. (9)  | 100 ± 2** (9)   | 0.17 ± 0.03* (9)   |
| Liver  | 24.0 ± 0.5 (6) | 177 ± 61 (6)  | 0.13 ± 0.01 (6) | 23.3 ± 1.6 n.s. (8)  | 72 ± 41 n.s.(8) | 0.34 ± 0.06* (8)   |
| Lung   | 25.1 ± 0.7 (6) | 425 ± 132 (6) | 0.09 ± 0.01 (6) | 24.2 ± 0.8 n.s. (10) | 65 ± 15** (10)  | 0.15 ± 0.01** (10) |

Values presented as mean ± SEM. Values in parentheses are the numbers of explants. Note that three, four, and two explants of 12 total for each of kidney, liver, and lung from *mCry1-luc* mice failed to display a significant circadian rhythm by FFT analysis. All six mPER2::LUC explants were rhythmic. n.s., no significant difference vs. corresponding mPER2::LUC data by *t* test.

\**P* < 0.05, \*\**P* < 0.01 vs. corresponding mPER2::LUC data by *t* test.

**Table S3.** Summary statistics for circadian bioluminescence rhythms recorded from MEFs derived from mPER2::LUC and *mCry1-luc* reporter mice

| Genotype         | No. | Period, h  | Amplitude     | RAE           |
|------------------|-----|------------|---------------|---------------|
| <i>mCry1-luc</i> | 6   | 23.6 ± 0.1 | 1,513 ± 244** | 0.123 ± 0.005 |
| mPER2::LUC       | 4   | 23.6 ± 0.3 | 445 ± 72      | 0.128 ± 0.006 |

Values presented as mean ± SEM.

\*\**P* < 0.01 vs. corresponding mPER2::LUC data by *t* test.

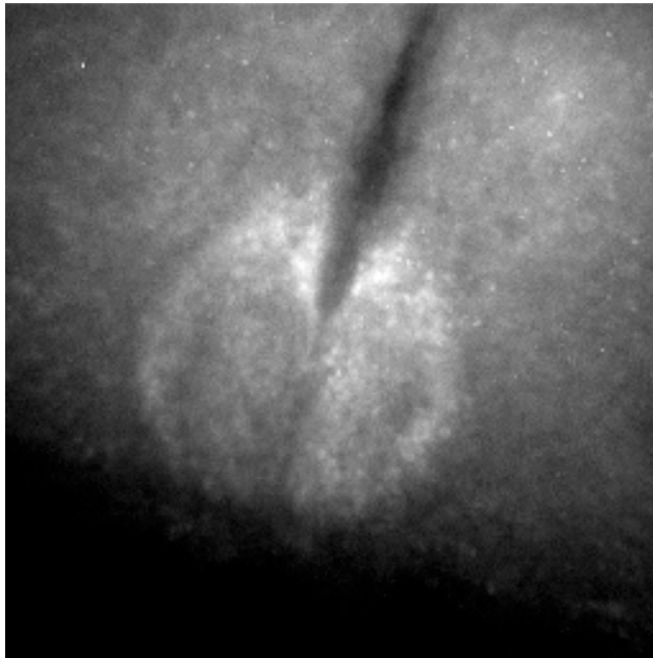

**Movie S1.** Representative recording of bioluminescence emission from *mCry1-luc* organotypic SCN slice culture.

[Movie S1](#)
